# Supplementary material for: Global profiling of alternative RNA splicing events provides insights into molecular differences between various types of hepatocellular carcinoma
Source: PubMed Central journal article supplement (PMC5002109; doi:10.1186/s12864-016-3029-z), 2016-08-26
Supplement: 12864_2016_3029_MOESM1_ESM.pdf [file 12864_2016_3029_MOESM1_ESM.pdf]

Global profiling of alternative RNA splicing events provides insights into molecular differences between various types of hepatocellular carcinoma.

Marie-Pier Tremblay, Victoria E. S. Armero, Andr ea Allaire, Simon Boudreault, Mathieu Durand, Elvy Lapointe, Philippe Thibault, Maude Tremblay-L tourneau, Jean-Pierre Perreault, Michelle S. Scott, Martin Bisailon

## SUPPLEMENTAL DATA

**Supplementary table 1 – Protein families encoded by transcripts that are differentially spliced in various types of HCC**

| Protein classification                                      | THBV/NNoV |          | THCV/NNoV |          | THBV&HCV/NNoV |          | TNoV/NNoV |          |
|-------------------------------------------------------------|-----------|----------|-----------|----------|---------------|----------|-----------|----------|
|                                                             | Freq.     | Percent. | Freq.     | Percent. | Freq.         | Percent. | Freq.     | Percent. |
| Extracellular matrix protein (PC00102)                      | 29        | 1.5%     | 12        | 1.4%     | 1             | 0.6%     | 18        | 1.2%     |
| Protease (PC00190)                                          | 50        | 2.5%     | 18        | 2.0%     | 5             | 3.0%     | 38        | 2.5%     |
| Cytoskeletal protein (PC00085)                              | 100       | 5.1%     | 53        | 6.0%     | 10            | 6.0%     | 88        | 5.7%     |
| Transporter (PC00227)                                       | 105       | 5.3%     | 56        | 6.3%     | 7             | 4.2%     | 91        | 5.9%     |
| Transmembrane receptor regulatory/adaptor protein (PC00226) | 4         | 0.2%     | 3         | 0.3%     | 1             | 0.6%     | 4         | 0.3%     |
| Transferase (PC00220)                                       | 159       | 8.0%     | 64        | 7.2%     | 11            | 6.6%     | 121       | 7.8%     |
| Oxidoreductase (PC00176)                                    | 68        | 3.4%     | 27        | 3.1%     | 5             | 3.0%     | 60        | 3.9%     |
| Lyase (PC00144)                                             | 27        | 1.4%     | 11        | 1.2%     | 2             | 1.2%     | 16        | 1.0%     |
| Cell adhesion molecule (PC00069)                            | 52        | 2.6%     | 20        | 2.3%     | 3             | 1.8%     | 44        | 2.9%     |
| Ligase (PC00142)                                            | 54        | 2.7%     | 32        | 3.6%     | 7             | 4.2%     | 49        | 3.2%     |
| Nucleic acid binding (PC00171)                              | 225       | 11.4%    | 114       | 12.9%    | 18            | 10.8%    | 173       | 11.2%    |
| Signaling molecule (PC00207)                                | 101       | 5.1%     | 39        | 4.4%     | 11            | 6.6%     | 61        | 4.0%     |
| Enzyme modulator (PC00095)                                  | 147       | 7.4%     | 74        | 8.4%     | 16            | 9.6%     | 103       | 6.7%     |
| Calcium-binding protein (PC00060)                           | 40        | 2.0%     | 19        | 2.2%     | 5             | 3.0%     | 31        | 2.0%     |
| Defense/immunity protein (PC00090)                          | 63        | 3.2%     | 24        | 2.7%     | 4             | 2.4%     | 49        | 3.2%     |
| Hydrolase (PC00121)                                         | 187       | 9.5%     | 77        | 8.7%     | 15            | 9.0%     | 144       | 9.3%     |
| Transfer/carrier protein (PC00219)                          | 39        | 2.0%     | 22        | 2.5%     | 2             | 1.2%     | 34        | 2.2%     |
| Membrane traffic protein (PC00150)                          | 54        | 2.7%     | 22        | 2.5%     | 7             | 4.2%     | 36        | 2.3%     |
| Phosphatase (PC00181)                                       | 45        | 2.3%     | 17        | 1.9%     | 3             | 1.8%     | 38        | 2.5%     |
| Transcription factor (PC00218)                              | 156       | 7.9%     | 67        | 7.6%     | 15            | 9.0%     | 128       | 8.3%     |
| Chaperone (PC00072)                                         | 15        | 0.8%     | 2         | 0.2%     | 0             | 0.0%     | 4         | 0.3%     |
| Cell junction protein (PC00070)                             | 10        | 0.5%     | 9         | 1.0%     | 2             | 1.2%     | 10        | 0.6%     |
| Surfactant (PC00212)                                        | 6         | 0.3%     | 4         | 0.5%     | 0             | 0.0%     | 4         | 0.3%     |
| Structural protein (PC00211)                                | 9         | 0.5%     | 5         | 0.6%     | 1             | 0.6%     | 9         | 0.6%     |
| Receptor (PC00197)                                          | 132       | 6.7%     | 53        | 6.0%     | 8             | 4.8%     | 112       | 7.3%     |
| Kinase (PC00137)                                            | 73        | 3.7%     | 32        | 3.6%     | 6             | 3.6%     | 61        | 4.0%     |
| Storage protein (PC00210)                                   | 5         | 0.3%     | 1         | 0.1%     | 0             | 0.0%     | 4         | 0.3%     |
| Isomerase (PC00135)                                         | 20        | 1.0%     | 5         | 0.6%     | 1             | 0.6%     | 11        | 0.7%     |
| Splicing factor                                             | 23        | 1.16%    | 13        | 1.6%     | 2             | 1.2%     | 15        | 1.0%     |
| Tumor suppressor                                            | 138       | 6.7%     | 63        | 3.0%     | 10            | 6.0%     | 109       | 7.1%     |
| Oncogene                                                    | 9         | 0.5%     | 4         | 0.5%     | 1             | 0.6%     | 5         | 0.3%     |

**Supplementary table 2 - Bioinformatical prediction of functional changes caused by some of ASEs identified.  
(Negative delta-PSI means that the short isoform is favored and positive delta-PSI means that the long isoform is favored)**

| Gene            | Delta PSI |           |               |           | Event type             | Predicted residue variation (AA) | Predicted functional consequence                                                               |
|-----------------|-----------|-----------|---------------|-----------|------------------------|----------------------------------|------------------------------------------------------------------------------------------------|
|                 | THBV/NNoV | THCV/NNoV | THBV&HCV/NNoV | TNoV/NNoV |                        |                                  |                                                                                                |
| <b>A2M</b>      | -13,1     | N/S       | N/S           | N/S       | exon-skipping          | -150                             | Loss of signal peptide, loss of part of MG2 domain                                             |
| <b>AAK1</b>     | -10,3     | N/S       | N/S           | N/S       | alternate-3p           | -1                               | Unknown/No predicted functional change                                                         |
| <b>ABCC10</b>   | -15,1     | N/S       | N/S           | -17,0     | alternate-3p           | 28                               | Gain of signal peptide                                                                         |
| <b>ACTA2</b>    | -22,2     | N/S       | N/S           | N/S       | exon-skipping          | -45                              | Loss of part of actin domain                                                                   |
| <b>ACVRL1</b>   | -15,5     | N/S       | N/S           | N/S       | multiple-exon-skipping | -174                             | Loss of a transmembrane domain, loss of a TGFb domain, loss of a tyrosine kinase domain        |
| <b>ADCY5</b>    | 16,2      | N/S       | N/S           | N/S       | exon-skipping          | 8                                | Unknown/No predicted functional change                                                         |
| <b>ALDH1A3</b>  | -16,4     | N/S       | N/S           | N/S       | multiple-exon-skipping | -107                             | Loss of a part of aldehyde dehydrogenase domain                                                |
| <b>ALDH2</b>    | -12,1     | N/S       | N/S           | N/S       | exon-skipping          | -47                              | Loss of a part of aldehyde dehydrogenase domain                                                |
| <b>AMDHD1</b>   | -18,4     | N/S       | N/S           | N/S       | exon-skipping          | -109                             | Loss a part of aminohydrolase family domain                                                    |
| <b>ANGPT1</b>   | 21,1      | 22,7      | N/S           | N/S       | alternate-5p           | 1                                | Unknown/No predicted functional change                                                         |
| <b>ANKIB1</b>   | -11,6     | N/S       | N/S           | N/S       | exon-skipping          | -731                             | Loss of all domains (ankyrin repeat, ankyrin repeat 5, IBR domain (a half ring finger domain)) |
| <b>ASPG</b>     | -21,8     | -19,7     | N/S           | -21,5     | exon-skipping          | -18                              | Unknown/No predicted functional change                                                         |
| <b>AXIN1</b>    | -10,9     |           | N/S           | N/S       | exon-skipping          | -36                              | Unknown/No predicted functional change                                                         |
| <b>BUB1B</b>    | N/S       | -24,6     | N/S           | -20,5     | alternate-3p           | 513                              | Gain a protein kinase domain and complete a Mad3/bub1 domain                                   |
| <b>C16orf59</b> | 29,0      | 31,9      | N/S           | 33,6      | alternate-3p           | 43                               | Complete the DUF (domain of unknown function) incomplete in the short isoform protein          |
| <b>C5orf34</b>  | 30,5      | 25,6      | N/S           | 27,6      | exon-skipping          | 441                              | Complete the DUF4524 (domain of unknown function) incomplete in the short isoform protein      |
| <b>CA13</b>     | 15,9      | 16,1      | N/S           | 12,1      | exon-skipping          | 262 AA protein to no protein     | Loss of the protein with a carbonic anhydrase domain due to NMD                                |

|                 |       |       |       |       |                                         |                              |                                                                                                      |
|-----------------|-------|-------|-------|-------|-----------------------------------------|------------------------------|------------------------------------------------------------------------------------------------------|
| <b>CAND1</b>    | -15,7 | N/S   | N/S   |       | alternate-5p+alternate-3p               | -490                         | Loss of transmembrane domains                                                                        |
| <b>CENPL</b>    | -25,4 | -29,8 | -34,3 | -29,4 | exon-skipping                           | -46                          | Unknown/No predicted functional change                                                               |
| <b>EHD3</b>     | -12,7 | N/S   | N/S   | N/S   | multiple-exon-skipping                  | -360                         | Loss of 2 NLS, loss a part of dynamin domain                                                         |
| <b>EHF</b>      | 37,8  | N/S   | N/S   | 35,2  | exon-skipping                           | 23                           | Unknown/No predicted functional change                                                               |
| <b>GTPBP4</b>   | -22,6 | N/S   | N/S   | N/S   | exon-skipping                           | -116                         | Unknown/No predicted functional change                                                               |
| <b>HADHA</b>    | -18,1 | N/S   | N/S   | N/S   | exon-skipping                           | -87                          | Loss of a part of the enoyl-CoA hydratase/isomerase domain                                           |
| <b>HAUS6</b>    | -17,0 | N/S   | N/S   | N/S   | alternate-3p                            | -35                          | Unknown/No predicted functional change                                                               |
| <b>HBEGF</b>    | -13,0 | N/S   | N/S   | N/S   | exon-skipping+alternate-5p+alternate-3p | 208 AA protein to no protein | Loss of the protein with an EGF-like domain due to the exclusion of the only exon coding for protein |
| <b>HGF</b>      | -18,5 | -17,6 | N/S   | -14,9 | alternate-3p                            | -5                           | Unknown/No predicted functional change                                                               |
| <b>IGFALS</b>   | N/S   | 10,1  | N/S   | N/S   | alternate-3p                            | 38                           | Gain of transmembrane domains                                                                        |
| <b>ITGB1</b>    | 24,7  | N/S   | N/S   | N/S   | exon-skipping                           | 3                            | Unknown/No predicted functional change                                                               |
| <b>KIFC1</b>    | 43,5  | 43,1  | 53,2  | 41,6  | alternate-3p                            | 8                            | Unknown/No predicted functional change                                                               |
| <b>KMO</b>      | 10,2  | N/S   | 11,9  | N/S   | alternate-3p                            | 27                           | Unknown/No predicted functional change                                                               |
| <b>LRRC16B</b>  | 31,4  | 35,5  | N/S   | 35,7  | exon-skipping                           | 947                          | Change of cellular localisation and loss of a part of CARMIL CTERM domain                            |
| <b>MARVELD2</b> | N/S   | -15,1 | N/S   | N/S   | exon-skipping                           | -12                          | Unknown/No predicted functional change                                                               |
| <b>MSS51</b>    | -10,3 | N/S   | N/S   | N/S   | alternate-3p                            | -221                         | Loss of a signal peptide, loss of a MYND finger domain                                               |
| <b>MT1G</b>     | -21,7 | N/S   | N/S   | -13,8 | alternate-3p                            | -1                           | Unknown/No predicted functional change                                                               |
| <b>MXD3</b>     | 39,5  | 34,2  | 42,7  | 35,3  | intron-retention                        | 195                          | Unknown/No predicted functional change                                                               |
| <b>NFKB1</b>    | 15,0  | N/S   | N/S   | N/S   | alternate-3p                            | 1                            | Unknown/No predicted functional change                                                               |
| <b>NOMO2</b>    | N/S   | N/S   | 21,1  | N/S   | exon-skipping                           | 167                          | Gain of a signal peptide                                                                             |
| <b>PANX2</b>    | 10,1  | N/S   | N/S   | N/S   | exon-skipping                           | -134                         | Gain of innexin domain and of 2 transmembrane domains                                                |

|               |       |       |       |       |                                                  |                                 |                                                                                                         |
|---------------|-------|-------|-------|-------|--------------------------------------------------|---------------------------------|---------------------------------------------------------------------------------------------------------|
| <b>PHF14</b>  | -12,1 | -14,0 | N/S   | N/S   | exon-skipping                                    | -285                            | Unknown/No predicted functional change                                                                  |
| <b>PRPF4B</b> | -34,5 | -31,5 | N/S   | -27,0 | alternate-5p+intron-retention                    | No protein to a 1007 AA protein | Gain of a tyrosine kinase protein (long isoform: NMD)                                                   |
| <b>PTPN1</b>  | -22,0 | N/S   | N/S   | N/S   | exon-skipping                                    | -73                             | Loss of a part of Y-phosphatase domain                                                                  |
| <b>RAB7A</b>  | -17,5 | N/S   | N/S   | N/S   | alternate-5p                                     | -47                             | Loss of half the Ras domain                                                                             |
| <b>RARB</b>   | -12,1 | N/S   | N/S   | N/S   | alternate-5p                                     | -112                            | Loss of a part of ZF-C4 domain (binding to DNA)                                                         |
| <b>RINT1</b>  | -11,7 | N/S   | N/S   | N/S   | alternate-5p+alternate-3p+multiple-exon-skipping | -425                            | Loss of NLS and loss of a part of RINT1 TIP1 domain                                                     |
| <b>SCRIB</b>  | -18,3 | -16,8 | N/S   | -17,9 | exon-skipping                                    | -25                             | Unknown/No predicted functional change                                                                  |
| <b>SFMBT1</b> | -10,1 | N/S   | N/S   | N/S   | exon-skipping                                    | -96                             | Loss of SAM1 domain                                                                                     |
| <b>SHQ1</b>   | -13,5 | -14,2 | N/S   | -13,1 | alternate-3p                                     | 89                              | Unknown/No predicted functional change                                                                  |
| <b>SLIT2</b>  | 62,9  | N/S   | N/S   | 43,6  | exon-skipping                                    | 8                               | Unknown/No predicted functional change                                                                  |
| <b>SPAG4</b>  | -27,2 | N/S   | -33,6 | N/S   | alternate-5p                                     | -77                             | Unknown/No predicted functional change                                                                  |
| <b>SPINT2</b> | N/S   | -11,8 | N/S   | N/S   | exon-skipping                                    | -57                             | Loss of Kunitz domain (inhibition of proteases)                                                         |
| <b>SUZ12</b>  | -12,7 | N/S   | N/S   | N/S   | exon-skipping                                    | -23                             | Unknown/No predicted functional change                                                                  |
| <b>TPSB2</b>  | N/S   | N/S   | 19,3  | N/S   | alternate-3p                                     | 152                             | Gain of signal peptide, gain of complete trypsin domain                                                 |
| <b>VPS13A</b> | -21,2 | -16,2 | -24,6 | -18,0 | exon-skipping                                    | -39                             | Unknown/No predicted functional change                                                                  |
| <b>WASF2</b>  | -28,6 | -14,5 | N/S   | -13,6 | exon-skipping                                    | -217                            | Loss of the WH2 motif                                                                                   |
| <b>ZGRF1</b>  | 15,5  | 17,4  | N/S   | 14,3  | exon-skipping                                    | No protein to a 2104 AA protein | Gain of a protein with 2 AAA domains, a GRF zinc finger motif and a DUF2439 domain (short isoform: NMD) |
| <b>ZNF35</b>  | 12,3  | N/S   | N/S   | N/S   | exon-skipping                                    | 160                             | Cytoplasmic protein (short isoform) goes to non-cytoplasmic (long isoform)                              |
| <b>ZNF445</b> | -19,8 | N/S   | N/S   | -20,2 | alternate-5p                                     | -12                             | Unknown/No predicted functional change                                                                  |
| <b>ZNF451</b> | -15,6 | N/S   | N/S   | N/S   | exon-skipping                                    | -48                             | Unknown/No predicted functional change                                                                  |
| <b>ZNF532</b> | -14,5 | -12,7 | N/S   | N/S   | alternate-5p                                     | -910                            | Unknown/No predicted functional change                                                                  |
| <b>ZNF552</b> | -10,6 | N/S   | -16,4 | -12,3 | alternate-5p                                     | 4                               | Unknown/No predicted functional change                                                                  |

**Supplementary table 3 – List of tumor suppressors for which AS is dysregulated in various types of HCC**

| THBV/NNoV |         |         | THCV/NNoV |         | THBV&HCV/NNoV | TNoV/NNoV |         |         |
|-----------|---------|---------|-----------|---------|---------------|-----------|---------|---------|
| ABI2      | EZH1    | RAB7A   | AFAP1L2   | SAMD9L  | CASP8         | ABI2      | HPGD    | SRPX    |
| ACHE      | EZH2    | RAP1GAP | BARD1     | SCRIB   | CTNND1        | AFAP1L2   | IKZF1   | STRADA  |
| AFAP1L2   | FAS     | RARB    | BIN1      | SEPT4   | FHIT          | AGTR1     | IKZF2   | TBRG1   |
| AGTR1     | FLNA    | RASSF1  | BRCA1     | SHQ1    | HACE1         | ALDH1A2   | ING1    | TCF3    |
| ALPL      | FOXP1   | RBL2    | CD44      | SIRT3   | ITGA7         | ALPL      | ING4    | TCF7L2  |
| ARID2     | GADD45A | RBM6    | CDKN2A    | SMARCB1 | KRIT1         | ARNTL     | IRF3    | TFPI2   |
| ARNTL     | GLS2    | RBMX    | CEACAM1   | SPINT2  | LIMA1         | BARD1     | ITGA7   | THRB    |
| AXIN1     | GPC3    | RINT1   | CHEK1     | TBRG1   | NDRG2         | BCL2L11   | KDM8    | TRIT1   |
| BARD1     | GSN     | RNF111  | CIZ1      | TCF3    | NF2           | BIN1      | KMT2C   | TSC1    |
| BCL2L11   | GSTT1   | RNH1    | COPS2     | TCF7L2  | TET2          | BLNK      | KRIT1   | VDR     |
| BIN1      | GTPBP4  | RPL10   | CREM      | TP73    |               | BRCA1     | LRP1B   | VEGFA   |
| BLNK      | HPGD    | RUNX3   | CSMD1     | TRIT1   |               | BRF1      | MAD1L1  | VEZT    |
| BRCA1     | HTATIP2 | SAFB    | CTNNA3    | TSC2    |               | CADM2     | MFSD2A  | VPS53   |
| BRF1      | ING1    | SAMD9L  | DIABLO    | VDR     |               | CASP8     | MLH1    | WWOX    |
| BTK       | ING3    | SCRIB   | DLG1      | VEGFA   |               | CCDC136   | MT1G    | XAF1    |
| CABLES1   | ING4    | SDHA    | DNMT3B    | VEZT    |               | CCNDBP1   | MTSS1   | ZMYND11 |
| CADM2     | IRF3    | SEMA3B  | DOK1      | WNK2    |               | CD4       | MTUS1   | ZNF382  |
| CASP8     | ITGA7   | SEPT4   | EMP1      |         |               | CD44      | NDRG2   |         |
| CCAR1     | ITGB1   | SHQ1    | ESR1      |         |               | CDK2      | NF2     |         |
| CCNDBP1   | KANK1   | SIRT2   | FLNA      |         |               | CEACAM1   | NPAS2   |         |
| CD44      | KDM8    | SIRT3   | GLS2      |         |               | CHEK1     | NRCAM   |         |
| CDK2      | KLF6    | SKP2    | GPC3      |         |               | CIZ1      | NUMB    |         |
| CEACAM1   | KMT2C   | SLIT2   | GSN       |         |               | CREM      | PARK2   |         |
| CHEK1     | KRIT1   | SMARCB1 | HPGD      |         |               | CSMD1     | PBRM1   |         |
| CHEK2     | MAD1L1  | SPOP    | IGFALS    |         |               | CTCFL     | PLAGL1  |         |
| CIZ1      | MBD4    | SRPX    | ING1      |         |               | CTNNA3    | PLCB3   |         |
| CNDP2     | MFSD2A  | STRADA  | ING3      |         |               | CTNND1    | PML     |         |
| CREM      | MME     | SUZ12   | ING4      |         |               | CUX1      | PPARA   |         |
| CSMD1     | MT1G    | TBRG1   | IRF3      |         |               | CYLD      | PRR5    |         |
| CTCF      | MTSS1   | TCF3    | ITGA7     |         |               | DICER1    | PTCH1   |         |
| CTNNA3    | MTUS1   | TCF7L2  | KANK1     |         |               | DLG1      | PTPN6   |         |
| CTNND1    | NDRG2   | TES     | KDM8      |         |               | DNMT3B    | RAP1GAP |         |
| CYLD      | NF1     | TET2    | KMT2C     |         |               | ECT2      | RASSF1  |         |
| DDB2      | NF2     | TFPI2   | KRIT1     |         |               | EDA2R     | RASSF4  |         |
| DLG1      | NFKB1   | THRB    | MAD1L1    |         |               | EGR2      | RBM6    |         |
| DMD       | NUMB    | TRIM35  | MLH1      |         |               | EHF       | RNH1    |         |
| DNAJA3    | PANX2   | TRIT1   | MTSS1     |         |               | EI24      | RPL10   |         |
| DNMT3B    | PBRM1   | TSC1    | NDRG2     |         |               | ESR1      | SCRIB   |         |
| EEF1A1    | PDCD4   | UHRF2   | NF1       |         |               | EZH1      | SEC14L2 |         |
| EGR2      | PHACTR4 | UVRAG   | NF2       |         |               | EZH2      | SEMA3B  |         |
| EHD3      | PLAGL1  | VEGFA   | NUMB      |         |               | FOXP1     | SEPT4   |         |
| EHF       | PPARA   | VEZT    | PBRM1     |         |               | GLS2      | SHQ1    |         |
| EI24      | PPP2R1B | VPS53   | PPARA     |         |               | GPC3      | SIRT3   |         |
| EMP1      | PTCH1   | WWOX    | PTPN6     |         |               | GSN       | SLIT2   |         |
| EPB41     | PTPN1   | XAF1    | RASSF4    |         |               | GSTT1     | SMARCA4 |         |
| ESR1      | PTPN6   | ZNF382  | RPL10     |         |               | HOPX      | SMARCB1 |         |

**Supplementary table 4 - List of oncogenes for which AS is dysregulated in various types of HCC**

| THBV/NNoV | THCV/NNoV | THBV&HCV/NNoV | TNoV/NNoV |
|-----------|-----------|---------------|-----------|
| CBFB      | ETS1      | CBFB          | AXL       |
| DEK       | KRAS      |               | CBFB      |
| ERBB2     | MYH11     |               | MDM2      |
| ERG       | TSC2      |               | MYH11     |
| ETS1      |           |               | PML       |
| KRAS      |           |               |           |
| MDM2      |           |               |           |
| MYH11     |           |               |           |
| TAL1      |           |               |           |

Supplementary table 5 - List of kinases for which AS is dysregulated in various types of HCC

| THBV/NNoV |         | THCV/NNoV |  | THBV&HCV/NNoV |  | TNoV/NNoV |         |
|-----------|---------|-----------|--|---------------|--|-----------|---------|
| ALPK1     | MAST4   | AURKA     |  | AURKB         |  | AURKA     | MPP1    |
| AURKA     | MELK    | AURKB     |  | CDK1          |  | AURKB     | MPP3    |
| AURKB     | MORN4   | CAMK2D    |  | PI4KAP1       |  | BRSK2     | MPP4    |
| AURKC     | MPP3    | CDC42BPA  |  | PIK3CB        |  | CAMK2D    | MVK     |
| BRSK2     | MVK     | CDK1      |  | RPS6KA4       |  | CAMK2G    | NEK2    |
| BTK       | NRBP2   | CDK10     |  | SLAMF7        |  | CD244     | NRBP2   |
| CAMK2D    | PANK1   | CHKB      |  |               |  | CDC42BPA  | PAPSS2  |
| CD244     | PAPSS2  | DGKZ      |  |               |  | CDK1      | PASK    |
| CD84      | PASK    | DGUOK     |  |               |  | CDK10     | PI4KAP1 |
| CDC42BPA  | PFKM    | DMPK      |  |               |  | CDK2      | PIK3CG  |
| CDK1      | PI4KAP1 | FES       |  |               |  | CDK4      | PRPF4B  |
| CDK10     | PIK3CB  | FYN       |  |               |  | CDKL3     | PRPS2   |
| CDK14     | PIP4K2C | GK5       |  |               |  | CERKL     | PTK7    |
| CDK2      | PIP5K1A | IP6K2     |  |               |  | CHKB      | RIPK2   |
| CDK20     | PRKDC   | KHK       |  |               |  | CLK3      | SGK3    |
| CDK4      | PRPF4B  | MAGIX     |  |               |  | CLK4      | SLAMF7  |
| CDKL3     | PRPS1   | MAP3K6    |  |               |  | CSNK1G1   | SPHK2   |
| CHKB      | PRPS2   | MORN1     |  |               |  | DGKG      | SRPK1   |
| CIT       | RIPK1   | MORN4     |  |               |  | DGKH      | STK16   |
| CMPK1     | RIPK2   | PAPSS2    |  |               |  | DGKZ      | TK2     |
| DGKG      | SGK1    | PI4KAP1   |  |               |  | DGUOK     | TNK2    |
| DGKZ      | SGK3    | PIK3CB    |  |               |  | DSTYK     | ULK3    |
| DGUOK     | SLAMF6  | PRPF4B    |  |               |  | FASTK     | VRK2    |
| EIF2AK2   | SLAMF7  | PTK6      |  |               |  | FES       | WNK4    |
| FES       | SPHK2   | RIPK1     |  |               |  | FGGY      |         |
| FYN       | SRPK1   | RPS6KA4   |  |               |  | FYN       |         |
| GK5       | STK16   | SPHK2     |  |               |  | GK5       |         |
| GNE       | TANC1   | STK16     |  |               |  | IKBKB     |         |
| HCK       | TESK2   | ULK3      |  |               |  | IP6K2     |         |
| IKBKB     | TK2     | WNK1      |  |               |  | KHK       |         |
| IKBKE     | TNK2    | WNK2      |  |               |  | KSR1      |         |
| IP6K2     | ULK3    | WNK4      |  |               |  | MAP3K6    |         |
| KHK       | VRK2    |           |  |               |  | MAPK13    |         |
| KSR1      | WNK1    |           |  |               |  | MARK1     |         |
| MAGIX     | WNK3    |           |  |               |  | MAST4     |         |
| MAPK13    | WNK4    |           |  |               |  | MELK      |         |
| MARK3     |         |           |  |               |  | MORN4     |         |



**Supplementary table 6 - List of transcription factors for which AS is dysregulated in various types of HCC**

| THBV/NNoV |         |         |        | THCV/NNoV |         | THBV&HCV/NNoV |          | TNoV/NNoV |         |  |
|-----------|---------|---------|--------|-----------|---------|---------------|----------|-----------|---------|--|
| ARHGAP5   | KBTBD4  | RNH1    | ZNF35  | BCL11A    | TCEA3   | ARHGAP5       | ARNTL    | NCOR1     | ZBTB24  |  |
| ARNTL     | KDM4A   | RRN3    | ZNF382 | CARD8     | TCF20   | HDGFRP2       | ATXN3    | NFAT5     | ZBTB38  |  |
| ARNTL2    | KDM5D   | RUNX3   | ZNF408 | CCNL2     | TCF3    | KAT6A         | BCL11A   | NFATC4    | ZBTB41  |  |
| BCL11A    | KRBOX4  | SFMBT1  | ZNF419 | CNOT1     | TFDP2   | LIMA1         | BRF1     | NFE2      | ZFP64   |  |
| BRF1      | LMO2    | SMARCE1 | ZNF445 | CNOT8     | TP73    | MXD3          | C3orf67  | NFE2L2    | ZMYM6   |  |
| BTBD1     | LRRC16B | SOX13   | ZNF451 | CREM      | UBAC2   | NLRC5         | CARD8    | NFIA      | ZMYND11 |  |
| C3orf67   | LRRFIP2 | SPOP    | ZNF502 | CRIP2     | UTY     | SMARCC2       | CBFA2T2  | NFYA      | ZNF107  |  |
| CAND1     | MKL1    | SREBF1  | ZNF512 | E2F7      | VDR     | SUPT20H       | CCNL2    | NFYC      | ZNF138  |  |
| CARD8     | MLXIPL  | STAT6   | ZNF532 | ETS1      | XPNPEP3 | TLE2          | CDIP1    | NLRC5     | ZNF169  |  |
| CBFA2T2   | MORF4L2 | SUPT20H | ZNF550 | FHL2      | YY1AP1  | ZBTB24        | CNOT8    | NLRP6     | ZNF195  |  |
| CCNL2     | MPND    | TAF11   | ZNF552 | FOSB      | ZBTB38  | ZMYM1         | CREB3L4  | NPAS2     | ZNF200  |  |
| CDIP1     | MSS51   | TAF6    | ZNF567 | FOSL1     | ZEB1    | ZMYND8        | CREM     | NR113     | ZNF233  |  |
| CIITA     | MXD3    | TAL1    | ZNF618 | FOXM1     | ZHX3    | ZNF211        | CRIP2    | NR2C1     | ZNF248  |  |
| CLOCK     | NCOA3   | TBX3    | ZNF707 | GATA3     | ZNF138  | ZNF552        | CTCF     | NR3C1     | ZNF266  |  |
| CNOT1     | NCOR1   | TCEA3   | ZNF793 | HDGFRP2   | ZNF169  | ZNF667        | CUX1     | PDLIM2    | ZNF274  |  |
| CNOT8     | NFAT5   | TCF20   | ZNF85  | HMGB2     | ZNF195  |               | E2F6     | PDLIM5    | ZNF285  |  |
| CREM      | NFATC3  | TCF3    | ZNF852 | HNF1B     | ZNF248  |               | E2F7     | PHC2      | ZNF331  |  |
| CRIP2     | NFIA    | TEAD2   | ZSCAN2 | HOXB6     | ZNF532  |               | EHF      | PLAG1     | ZNF346  |  |
| CTCF      | NFKB1   | TFDP2   |        | ING1      | ZNF550  |               | ELK1     | PLAGL1    | ZNF382  |  |
| E2F6      | NFYA    | TFEB    |        | ING4      | ZNF559  |               | FHL2     | POGZ      | ZNF408  |  |
| E2F7      | NLRC5   | TFEC    |        | IRF3      | ZNF707  |               | FOSB     | PPARA     | ZNF431  |  |
| EHF       | NLRP6   | THRB    |        | JMJD1C    |         |               | FOSL1    | PQBP1     | ZNF445  |  |
| ELF1      | NR1D1   | TLE2    |        | KDM5D     |         |               | FOXM1    | PRDM16    | ZNF446  |  |
| ELK1      | NR113   | TOX4    |        | LRRC16B   |         |               | FOXP1    | RARG      | ZNF502  |  |
| ERG       | NR2C1   | TRIM35  |        | LRRFIP2   |         |               | FOXP2    | REST      | ZNF512  |  |
| ETS1      | NR3C1   | UBAC2   |        | MARVELD2  |         |               | GATA3    | RNH1      | ZNF527  |  |
| FHL2      | NR3C2   | USF2    |        | MLXIPL    |         |               | HDGFRP2  | RRN3      | ZNF550  |  |
| FOSB      | PDDC1   | UTY     |        | MORF4L2   |         |               | HMGB2    | SMARCE1   | ZNF552  |  |
| FOSL1     | PDLIM2  | WIZ     |        | MXD3      |         |               | HOXB6    | STAT6     | ZNF582  |  |
| FOXK2     | PDLIM5  | XPNPEP3 |        | MYNN      |         |               | IKZF1    | SUPT20H   | ZNF618  |  |
| FOXM1     | PEPD    | YY1AP1  |        | NCOA1     |         |               | IKZF2    | TAF6      | ZNF707  |  |
| FOXP1     | PHC2    | ZBTB24  |        | NCOA3     |         |               | ING1     | TCEA3     | ZNF738  |  |
| GABPA     | PHF14   | ZBTB38  |        | NCOR1     |         |               | ING4     | TCF12     | ZNF79   |  |
| GATA3     | PLAG1   | ZBTB41  |        | NFYA      |         |               | IRF3     | TCF20     | ZNF793  |  |
| GCFC2     | PLAGL1  | ZEB1    |        | NR113     |         |               | IVNS1ABP | TCF3      | ZNF821  |  |
| GNE       | POGZ    | ZEB2    |        | NR2C1     |         |               | JMJD1C   | TEAD2     | ZSCAN2  |  |
| HDGFRP2   | PPARA   | ZFP64   |        | NR3C1     |         |               | KDM5D    | TEAD4     |         |  |
| HMGB2     | PPARD   | ZHX3    |        | PHC2      |         |               | LMO2     | TFDP2     |         |  |
| HNF1B     | PQBP1   | ZNF107  |        | PHF14     |         |               | LRRC16B  | THRB      |         |  |
| HOXB6     | PRDM16  | ZNF131  |        | PLAG1     |         |               | LRRFIP2  | TLE2      |         |  |
| ING1      | PRRC2B  | ZNF195  |        | POGZ      |         |               | MKL1     | UBAC2     |         |  |
| ING4      | RARA    | ZNF200  |        | PPARA     |         |               | MLXIPL   | UTY       |         |  |
| IRF3      | RARB    | ZNF211  |        | PQBP1     |         |               | MORF4L2  | VDR       |         |  |
| IRF6      | RARG    | ZNF233  |        | PRRC2B    |         |               | MPND     | XPNPEP3   |         |  |
| IVNS1ABP  | RBL2    | ZNF248  |        | PRRC2C    |         |               | MXD3     | YY1AP1    |         |  |
| JMJD1C    | RELA    | ZNF331  |        | RRN3      |         |               | NCOA3    | ZBTB17    |         |  |

Supplementary table 7 - List of genes for which AS is dysregulated in all types of HCC

| ASEs misregulated in the four types of HCC |          |           |         |         |
|--------------------------------------------|----------|-----------|---------|---------|
| ACP1                                       | CENPL    | INCENP    | OGFOD2  | SLC2A6  |
| ACSL4                                      | CEP164   | ISYNA1    | OSBPL6  | SLC7A7  |
| ASPM                                       | CLN3     | ITGA7     | PARPBP  | SORT1   |
| ATXN2L                                     | DHRS4L2  | KIAA0895L | PCYT2   | ST3GAL3 |
| AURKB                                      | ENO3     | KIAA1324  | PDE4DIP | STAU2   |
| C1orf86                                    | FAM86C1  | KIFC1     | PHF3    | STK25   |
| C5orf42                                    | FDFT1    | KRIT1     | PI4KAP1 | TAMM41  |
| C6orf201                                   | FETUB    | MDK       | PIK3R3  | TJP2    |
| CARD14                                     | FN1      | MICU1     | PMM2    | VEGFB   |
| CARKD                                      | GOLGA2   | MSTO1     | POLL    | VPS13A  |
| CCDC64                                     | GPR116   | MXD3      | PORCN   | WASH2P  |
| CD27-AS1                                   | HDGFRP2  | NDRG2     | RCC1    | WASH7P  |
| CDC45                                      | HNRNPUL1 | NEB       | RGS3    | ZFYVE19 |
| CDK1                                       | IL17RE   | NF2       | SEC31B  | ZNF655  |
| CDS2                                       | IL32     | NIPA2     | SKA2    | ZNF692  |

**Supplementary table 8 - List of genes uniquely dysregulated in HBV-associated HCC**

| ASEs misregulated in only THBV/NNov |           |         |          |          |              |           |         |          |          |        |
|-------------------------------------|-----------|---------|----------|----------|--------------|-----------|---------|----------|----------|--------|
| A2M                                 | BAZ2A     | CR2     | F7       | GUSBP4   | LOC100506054 | NKTR      | POFUT2  | RSU1     | STEAP1B  | TSPO   |
| AAK1                                | BBS4      | CRYZ    | F9       | HADHA    | LOC155060    | NMRAL1    | POGK    | RTN2     | STOM     | TTC7A  |
| ABCB7                               | BCL2L14   | CSDE1   | FADS6    | HAL      | LOC619207    | NOL11     | POLB    | RTN3     | STRAP    | TUFT1  |
| ABCD3                               | BCS1L     | CSF3R   | FAM153A  | HAUS6    | LOC654433    | NOVA1     | POLDIP3 | RUNX3    | STT3A    | TXN2   |
| ABHD10                              | BDP1      | CTCF    | FAM179B  | HBEGF    | LRIF1        | NPEPPS    | POLR2M  | SAFB     | STX16    | UACA   |
| ABI3BP                              | BIVM      | CTH     | FAM198A  | HCK      | LRRRC61      | NPHP3     | POLR3D  | SAP130   | STX5     | UBAP1  |
| ACAD8                               | BRAP      | CTNNAL1 | FAM199X  | HEATR5A  | LSS          | NR1D1     | PPARD   | SBF1     | SULF1    | UBAP2L |
| ACADSB                              | BRWD3     | CWF19L2 | FAM206A  | HEATR5B  | LTBP3        | NR3C2     | PPIL2   | SBNO1    | SUMF2    | UBE2K  |
| ACCS                                | BSDC1     | CXorf38 | FAM210A  | HECTD1   | LUZP6        | NRBF2     | PPM1E   | SCAND2P  | SUN1     | UBL7   |
| ACHE                                | BTBD1     | CYBRD1  | FAM228A  | HECTD3   | LYPLA1       | NRG3      | PPP1R10 | SCARB1   | SUN2     | UBQLN4 |
| ACLY                                | BTK       | CYFIP2  | FAM3C    | HERC4    | LYSMD3       | NSG1      | PPP1R8  | SDC4     | SURF4    | UCHL5  |
| ACMSD                               | C10orf118 | CYP2B6  | FAM57A   | HHAT     | MAGT1        | NUCB2     | PPP2R1A | SDHA     | SUV420H1 | UHRF2  |
| ACSS2                               | C14orf159 | CYP2C8  | FAM63B   | HINT3    | MAN2B2       | NUDT9     | PPP2R1B | SDHAP2   | SUZ12    | USF2   |
| ACTA2                               | C15orf39  | CYP39A1 | FAM65C   | HMGCS2   | MANEAL       | NUP50     | PPP2R5D | SEC23A   | SWAP70   | USP15  |
| ACTL6A                              | C16orf62  | CYP4F2  | FAS      | HNRNPC   | MAP4         | NUP54     | PPP4R1  | SEC23IP  | SYNE1    | USP36  |
| ACVRL1                              | C21orf58  | DAO     | FASTKD2  | HNRNPH3  | MAPKAP1      | OGFOD1    | PRG4    | SEC24D   | SYNJ2    | UVRAG  |
| ADAM10                              | C2CD5     | DAXX    | FBLN7    | HP1BP3   | MARCH6       | OGT       | PRKCSH  | SEC61A1  | SYP      | VAC14  |
| ADAR                                | C6orf106  | DAZAP2  | FBXL5    | HSD11B1L | MARK3        | ORC4      | PRKDC   | SECISBP2 | TAF11    | VAMP7  |
| ADCY3                               | CABLES1   | DCAF7   | FBXO3    | HSD17B4  | MATN3        | OXR1      | PRMT2   | SEMA5B   | TAL1     | VASH2  |
| ADCY5                               | CABYR     | DCDC5   | FGFR4    | HSD3B7   | MAVS         | P2RX4     | PRMT5   | SENP6    | TANC1    | VMP1   |
| ADH6                                | CACNA1H   | DDB2    | FKBP10   | HSDL2    | MBD1         | P4HA2     | PRNP    | SEPT10   | TARS     | VNN2   |
| ADPGK                               | CALCOCO2  | DEK     | FKBP5    | HSF4     | MBD4         | PADI1     | PRPS1   | SERPINF2 | TBC1D4   | VPS16  |
| AGPAT1                              | CALD1     | DET1    | FKRP     | HSPH1    | MBNL3        | PAK4      | PRSS8   | SETD4    | TBRG4    | VPS26A |
| AGXT2L1                             | CAND1     | DGAT2   | FLJ00385 | HTATIP2  | MCCC1        | PANK1     | PSMC1   | SFMBT1   | TBX3     | VPS41  |
| ALB                                 | CANX      | DGCR2   | FLYWCH1  | HYLS1    | MCCC2        | PANX2     | PSMD3   | SFXN4    | TCP11L1  | VSIG4  |
| ALDH18A1                            | CAP1      | DHCR24  | FLYWCH2  | IAH1     | MCOLN3       | PARP9     | PSME4   | SGCD     | TCTN3    | VWF    |
| ALDH1A3                             | CAPN1     | DHX36   | FNBP1L   | IARS     | MEAF6        | PCBP1-AS1 | PTCD3   | SGCE     | TDRD9    | WAC    |
| ALDH2                               | CBWD3     | DHX40   | FOLH1    | IBTK     | MEF2D        | PCGF3     | PTDSS1  | SGK1     | TECPR2   | WDR44  |
| ALPK1                               | CCAR1     | DHX58   | FOPNL    | ICAM1    | MEMO1        | PCGF6     | PTPLAD1 | SGSM3    | TES      | WDR6   |
| AMD1                                | CCDC111   | DIAPH1  | FOXK2    | IDH3A    | METTL23      | PCK1      | PTPN1   | SH3PXD2A | TESK2    | WIPF2  |
| AMDHD1                              | CCDC135   | DIO1    | FTSJ2    | IDI1     | METTL5       | PCK2      | PTPN21  | SHANK2   | TFEB     | WIZ    |
| AMPD3                               | CCDC25    | DMD     | FUT6     | IFNLR1   | MFN1         | PCNX      | PVRL4   | SIGLEC10 | TFEC     | WNK3   |
| ANKHD1                              | CCDC90B   | DMGDH   | FZD6     | IGSF9    | MFSD12       | PCNXL4    | PWWP2A  | SIMC1    | TGM2     | WSB2   |
| ANKIB1                              | CCM2      | DNAJA1  | G3BP1    | IKBKE    | MGAT4B       | PCYOX1    | PYGL    | SIRT2    | THEMIS   | XIRP1  |
| ANKRD19P                            | CCNG1     | DNAJA3  | G6PC     | IL10RA   | MGME1        | PDCD1     | RAB18   | SKIV2L2  | THSD7B   | XPC    |
| ANKS6                               | CCSER2    | DNAJC19 | G6PC3    | IL18RAP  | MINK1        | PDCD4     | RAB2B   | SKP2     | THTPA    | XRCC6  |
| ANXA8                               | CD200     | DNM2    | GABPA    | IL6ST    | MIOS         | PDDC1     | RAB5A   | SLAMF6   | TIMM10B  | XRN2   |
| AOX1                                | CD300A    | DNPEP   | GABPB1   | INTS9    | MLIP         | PDE3B     | RAB5B   | SLC13A5  | TLR2     | YWHAE  |
| AP1AR                               | CD34      | DPP3    | GADD45A  | IREB2    | MLLT4        | PDE8B     | RAB6A   | SLC15A4  | TLR4     | ZBTB21 |

|           |         |          |         |           |        |         |         |          |             |         |
|-----------|---------|----------|---------|-----------|--------|---------|---------|----------|-------------|---------|
| AP5M1     | CD68    | DRAM2    | GCFC2   | IRF6      | MLPH   | PDGFC   | RAB7A   | SLC17A1  | TM9SF2      | ZC3H14  |
| APH1A     | CD84    | DSCR3    | GDA     | ITCH      | MME    | PDHB    | RABEP1  | SLC23A2  | TMBIM1      | ZC3HC1  |
| API5      | CDC25B  | DUS3L    | GDE1    | ITFG3     | MMP19  | PDHX    | RABGAP1 | SLC25A13 | TMEM116     | ZCCHC6  |
| APMAP     | CDK14   | DUSP16   | GDI2    | ITGB1     | MMRN2  | PDXDC1  | RAI2    | SLC25A43 | TMEM136     | ZCWPW1  |
| APP       | CDK20   | DYM      | GEM     | IWS1      | MNS1   | PDXDC2P | RAP1B   | SLC27A2  | TMEM161B    | ZDHHC19 |
| AQP3      | CDS1    | DYNC1LI1 | GEMIN7  | JKAMP     | MOB2   | PDZK1   | RARA    | SLC2A14  | TMEM167B    | ZDHHC23 |
| AQP6      | CECR2   | DYNC2LI1 | GEMIN8  | KBTBD4    | MON1B  | PEPD    | RARB    | SLC2A2   | TMEM170A    | ZDHHC5  |
| ARCN1     | CELF2   | EBF4     | GFM2    | KCNT2     | MRC2   | PFKFB4  | RARS    | SLC30A5  | TMEM216     | ZEB2    |
| ARFGAP3   | CERS2   | ECD      | GFOD2   | KDM4A     | MROH7  | PFKM    | RASSF6  | SLC35B2  | TMEM254     | ZFYVE9  |
| ARHGEF10L | CFHR4   | EEF1A1   | GLE1    | KIAA0125  | MRPL3  | PGGT1B  | RBBP5   | SLC38A2  | TMEM254-AS1 | ZMAT5   |
| ARID2     | CHD6    | EFTUD2   | GLYATL1 | KIAA0232  | MSS51  | PGRMC1  | RBL2    | SLC38A7  | TMEM30A     | ZNF131  |
| ARL5A     | CHEK2   | EHD3     | GMPS    | KIAA1598  | MST1P2 | PHACTR4 | RBM23   | SLC44A3  | TMEM44      | ZNF302  |
| ARL6IP1   | CHRD    | EIF2AK2  | GNAS    | KIDINS220 | MTA1   | PI16    | RBM24   | SLC7A9   | TMEM63B     | ZNF326  |
| ARL8B     | CIDEC   | ELAC2    | GNB1    | KLF6      | MTF2   | PIBF1   | RBM42   | SLC9A8   | TMEM66      | ZNF35   |
| ARNTL2    | CIITA   | ELF1     | GNB5    | KLF7      | MTFR1  | PIGA    | RBM47   | SLMAP    | TMEM8A      | ZNF410  |
| ASB13     | CIRH1A  | ELN      | GNE     | KLHL12    | MTM1   | PIGG    | RBMX    | SMARCD1  | TMPRSS4     | ZNF415  |
| ASH2L     | CIT     | EML4     | GNL3    | KLHL2     | MTMR14 | PIGT    | RCBTB2  | SMEK1    | TMTC1       | ZNF419  |
| ASPH      | CLASRP  | ENOPH1   | GNS     | KLRD1     | MYD88  | PIK3R5  | RDH16   | SMIM8    | TNKS1BP1    | ZNF451  |
| ASPN      | CLOCK   | ENOX2    | GOLGA5  | KPNB1     | MYLIP  | PIP4K2C | RELA    | SNAP23   | TOLLIP      | ZNF567  |
| ASUN      | CMPK1   | ENPP2    | GOLPH3L | KRBOX4    | MYO9B  | PIP5K1A | RETSAT  | SNTA1    | TOP2B       | ZNF839  |
| ATG16L1   | CNDP2   | EOGT     | GOT2    | LAMP1     | NAA60  | PLA2G1B | RGPD1   | SOX13    | TOR3A       | ZNF85   |
| ATP2B2    | CNPY3   | EPB41    | GNPMB   | LASP1     | NAE1   | PLEKHH3 | RHPN2   | SPAG9    | TOX4        | ZNF852  |
| ATP2B4    | CNTRL   | ERBB2    | GPR137  | LGMN      | NARG2  | PLEKHO2 | RINT1   | SPECC1L  | TPRG1L      |         |
| ATP2C1    | COG3    | ERBB3    | GPR161  | LILRB1    | NARS   | PLS3    | RMDN2   | SPOP     | TRAP1       |         |
| ATP5SL    | COL18A1 | ERC1     | GPR180  | LILRB2    | NBEAL1 | PMPCA   | RNF111  | SPSB3    | TRAPPC11    |         |
| ATP6V1C1  | COL1A2  | ERG      | GRAMD1B | LILRB3    | NCAPG2 | PMS2CL  | RNF4    | SRD5A1   | TRAPPC6A    |         |
| ATP7B     | COL6A6  | ERMP1    | GRB2    | LILRB5    | NDC1   | PMS2P5  | RNGTT   | SREBF1   | TRAPPC6B    |         |
| ATP9B     | COQ5    | ERVK13-1 | GSS     | LIPC      | NDUFS5 | PNPO    | RPH3AL  | SRP54    | TRIM35      |         |
| AURKC     | CORO1C  | ESYT2    | GSTO2   | LIPG      | NET1   | PODN    | RRAS2   | SRP72    | TRIM41      |         |
| AXIN1     | CPD     | F11R     | GTPBP4  | LMAN2L    | NFATC3 | PODXL   | RRM1    | SSFA2    | TRIM5       |         |
| BACE1     | CPSF7   | F3       | GUCY1B3 | LMBR1     | NFKB1  | POFUT1  | RSAD1   | ST6GAL1  | TRPV3       |         |

**Supplementary table 9 - List of genes uniquely dysregulated in HCV-associated HCC**

| ASEs misregulated in only THC/NNov |           |         |          |
|------------------------------------|-----------|---------|----------|
| AASS                               | FCGR3A    | MORN1   | SLC10A7  |
| ANXA2                              | FGFR1OP   | MRPL55  | SMARCAD1 |
| ATP6V0B                            | FLJ39739  | MTHFSD  | SNX5     |
| CACNB4                             | FUT10     | MYNN    | SPINT2   |
| CCDC7                              | GLT1D1    | N4BP2L1 | SUSD1    |
| CD22                               | HNRNPH1   | NAALAD2 | TFPI     |
| CDKN2A                             | IGFALS    | NCOA1   | TGIF1    |
| CHRNA4                             | IL9R      | NEIL2   | TP73     |
| COPS2                              | INIP      | PHGDH   | TROVE2   |
| DIABLO                             | JHDM1D    | PHYHD1  | TSC2     |
| DMPK                               | KAZN      | PPP3CB  | WNK2     |
| DNAJC18                            | KLHDC1    | PRRC2C  | WNT2     |
| DOK1                               | LINC00875 | PTK6    | ZNF106   |
| EFCAB1                             | LOC388152 | R3HDM2  | ZNF30    |
| EMR1                               | MAEL      | RACGAP1 | ZNF559   |
| FAM83A-AS1                         | MARS      | RYK     | ZNF568   |
| FBXO28                             | MARVELD2  | SAMD4A  | ZNF638   |

Supplementary table 10 - List of genes uniquely dysregulated in HBV&HCV-associated HCC

| ASEs misregulated in only THBV&HCV/NNov |           |          |
|-----------------------------------------|-----------|----------|
| ALAD                                    | HACE1     | RGN      |
| ALOX12P2                                | KAT6A     | RPL15    |
| ARHGAP44                                | KIFC3     | SMARCC2  |
| ATP6V1H                                 | KMT2E     | SNRPN    |
| C7orf63                                 | LANCL1    | SYBU     |
| CD28                                    | LIMA1     | TCIRG1   |
| CD8B                                    | LIN54     | TPSB2    |
| CNTNAP3                                 | MCTP1     | TRABD2A  |
| CYP21A2                                 | MIB2      | VANGL1   |
| DHX35                                   | NBPF10    | WDPCP    |
| FAM135A                                 | NBPF8     | WEE2-AS1 |
| FAM13A                                  | NCEH1     | XRCC1    |
| FHIT                                    | NOMO2     | ZCCHC7   |
| FYB                                     | NR2F1-AS1 | ZFAT     |
| GDPD5                                   | ORAI2     | ZMYM1    |
| GIGYF2                                  | PACSIN3   | ZMYND8   |
| GNL1                                    | PMEPA1    | ZNF182   |
| GRB10                                   | RBMS1     | ZNF667   |

**Supplementary table 11 - List of genes uniquely dysregulated in virus-free HCC**

| ASEs misregulated in only TNoV/NNov |          |              |                |          |
|-------------------------------------|----------|--------------|----------------|----------|
| AADAT                               | CSNK1G1  | JOSD2        | PIK3CG         | STAC3    |
| ACSF2                               | CTCF     | KANSL1       | PLCB3          | STAG3L3  |
| ACSL6                               | CUL9     | KCNK17       | PLEKHS1        | STARD3   |
| ADORA2A                             | CUTC     | KCNMB3       | PML            | SUV39H2  |
| AKAP17A                             | CUX1     | KIAA0391     | POLR1B         | SVEP1    |
| ALDH1A2                             | CWF19L1  | KIAA0895     | PPCS           | TBC1D17  |
| AMZ2                                | CYB561D1 | KIF20B       | PPP2R2B        | TBCK     |
| APOBEC3B                            | DCAF11   | KLHL3        | PRDX1          | TCF12    |
| ARHGAP30                            | DCUN1D2  | KLRF1        | PROM1          | TDP1     |
| ARMC7                               | DDX11L1  | LGALS9       | PRR5           | TEAD4    |
| ATP13A4                             | DGKH     | LIMCH1       | PSMD13         | TESPA1   |
| ATRNL1                              | DICER1   | LINC00910    | PSPH           | TIMD4    |
| ATXN1                               | DIO2     | LOC100287534 | PSTPIP1        | TM4SF19  |
| ATXN3                               | DIO3AS   | LOC400927    | PTK7           | TM7SF2   |
| ATXN7L3                             | DIP2A    | LOXL2        | PTPN20A        | TMEM67   |
| AXL                                 | DMAP1    | LOXL3        | PTPN20B        | TNFRSF25 |
| BBS1                                | DSTYK    | LRP1B        | PTPRS          | TOMM40L  |
| BBX                                 | ECT2     | LRRC23       | PYCR1          | TPK1     |
| BCAS1                               | EDA2R    | LRRC7        | RAB37          | TREML1   |
| BCL7B                               | EPHA5    | LRRK1        | RABL5          | TRIM39   |
| BDKRB2                              | ERCC6L2  | LRRN2        | RAD51AP1       | TRPC4    |
| BPY2                                | FAM213B  | LUZP2        | RAPGEF1        | TTLL3    |
| BTBD7                               | FAM21A   | MARK1        | RAPGEF3        | TTLL7    |
| BTNL8                               | FAM227A  | MAZ          | RBM14-RBM4     | TTYH1    |
| BTRC                                | FAM92A1  | MCM2         | REPS1          | UBE2J2   |
| C12orf65                            | FASTK    | MDH1B        | RERG           | UBE2W    |
| C1orf109                            | FBXL2    | MICAL2       | REST           | UNK      |
| C1QTNF6                             | FGGY     | MPC2         | RGL4           | UPF3B    |
| C21orf91                            | FOXP2    | MPP1         | RGS11          | USP25    |
| CADPS                               | FRMD1    | MPP4         | RIMBP2         | UXS1     |
| CALML4                              | FUZ      | MRPL52       | RINL           | VIPR2    |
| CAMK2G                              | GALNT14  | MS4A14       | RPGRIP1        | VWA1     |
| CAPN12                              | GALNT6   | MSANTD2      | RPL23AP7       | VWDE     |
| CCDC136                             | GAPVD1   | MTCH1        | RRAGC          | WASF3    |
| CCDC149                             | GATS     | NDUFAF7      | RTEL1-TNFRSF6B | WASH1    |
| CCDC91                              | GDAP1    | NECAB2       | RUNDC3B        | WDR20    |
| CD320                               | GEMIN5   | NEK2         | SCAMP4         | WDR81    |
| CD4                                 | GEN1     | NFASC        | SCARA5         | WSCD1    |
| CDAN1                               | GLIS3    | NFATC4       | SEC14L2        | ZBTB17   |

|         |         |          |          |         |
|---------|---------|----------|----------|---------|
| CDC25A  | GPM6A   | NFE2     | SENP7    | ZDHHC15 |
| CEP97   | GRAP2   | NFE2L2   | SH2D1A   | ZMYM6   |
| CERKL   | GUCY1B2 | NFYC     | SIGMAR1  | ZMYND11 |
| CFLAR   | HDAC7   | NHSL2    | SLC12A4  | ZNF266  |
| CHN1    | HDAC8   | NLGN4X   | SLC14A1  | ZNF274  |
| CHRNA7  | HELB    | NPAS2    | SLC25A12 | ZNF285  |
| CIB2    | HERC2P3 | NRCAM    | SLC25A19 | ZNF334  |
| CLCN7   | HFE     | NXF3     | SLC26A3  | ZNF346  |
| CLEC4A  | HLA-G   | ORAOV1   | SLC30A10 | ZNF431  |
| CLIP1   | HMCN1   | P2RX2    | SLC35F6  | ZNF446  |
| CLK3    | HNRNPA1 | P4HA1    | SLC35G1  | ZNF454  |
| CLK4    | HOPX    | PAK3     | SLFN12   | ZNF527  |
| CNIH2   | HPSE    | PAOX     | SMARCA4  | ZNF534  |
| CNTN5   | ICA1    | PAPD5    | SNAP91   | ZNF582  |
| COL24A1 | IGFLR1  | PARK2    | SNCAIP   | ZNF738  |
| CPA5    | IKZF1   | PCDH18   | SNRPA1   | ZNF79   |
| CRCP    | IKZF2   | PDCD1LG2 | SPATA9   | ZNF791  |
| CREB3L4 | IL34    | PDE10A   | SPDL1    | ZNF821  |
| CRYZL1  | INF2    | PGBD2    | SPEF2    | ZNF823  |
| CSF2RA  | ISCU    | PGPEP1   | SSPO     | ZSCAN25 |
| CSF2RB  | IYD     | PIFO     | ST7L     |         |

---



## SUPPLEMENTARY FIGURES

**Figure S1. Characterization of splicing dysregulation in HCC. (A)** Distribution of Delta PSI values in various types of HCC. **(B)** Distribution of multiple alternative splicing events (ASEs) in each gene for various types of HCC. **(C)** The splicing events lists for various types of HCC were filtered to keep only data with at least two replicates for both virus-induced HCC and virus-free healthy tissues (NNoV). Fold changes were then calculated between HCC and healthy tissues. Q-values (false-discovery rate) were calculated in order to take into account multiple statistical hypothesis testing, and results under 0.05 were considered significant. Events with a P-value of less than 0.05 were conserved. Events with expression levels higher than one TPM in at least one dataset were conserved.

**Fig. S2. Characterization of ASEs that are modified in HBV- and HCV-associated HCC. (A)** Gene ontology analysis for alternative splicing modifications in HBV- and HCV-associated HCC. The asterisk (\*) indicates the other categories: Cellular process (GO: 0009987), cellular component organization or biogenesis (GO: 0071840), localization (GO: 0051179), locomotion (GO: 0040011) and multicellular organismal process (GO: 0032501). **(B)** Interaction network for cellular genes for which AS is modified in both HBV- and HCC-associated HCC. The network was determined by uploading the genes into STRING.

**Figure S3. AS modifications in transcripts encoded by kinases and transcription factors in HBV- and HCV-associated HCC. (A)** Alterations in the AS patterns of transcripts encoded by kinases in HBV- and HCV-associated HCC. Some transcripts have multiple ASEs that are modified. Red bars indicate negative Delta PSI values, and blue bars represent positive Delta PSI values. **(B)** Alterations in the AS patterns of transcripts encoded by transcription factors in HBV- and HCV-associated HCC.

**Figure S4. Global profiling of ASE modifications in both HBV&HCV-associated HCC and virus-free-associated HCC. (A)** Heatmap representation of ASEs (PSI values) for

cellular transcripts in HBV&HCV-associated HCC. Data obtained from THBV&HCV (HBV&HCV-associated HCC) tissues are shown in purple and data obtained from healthy tissues (NNoV) are shown in green. **(B)** Heatmap representation of ASEs (PSI values) for cellular transcripts in virus-free HCC. Data obtained from virus-free-associated HCC tissues are shown in yellow and data obtained from healthy tissues (NNoV) are shown in green.

**Figure S5.** RNA splicing factors in HCC. Iris Graph representing the expression profile of splicing factors for **(A)** HCV-, **(B)** HBV&HCV-, and **(C)** virus-free HCC. Differences in gene expression levels are shown on a logarithmic color scale (Log2), from red (negative changes in expression) to blue (increase in gene expression). The expression of proteins involved in splicing modulated by more than 2-fold is indicated by an asterisk.

**Fig. S6. Modifications to AS of 96 transcripts in response to knockdown of splicing factors with specific siRNAs.** Using specific siRNAs, twelve splicing factors (listed on the right) were individually knocked-down in different cell lines to assess their implication in splicing of 96 different transcripts (listed at the top). Individual knockdowns and ASEs are shown to indicate which knockdowns caused a shift in alternative splicing in various cell lines (PC-3, SKOV3, NIH:OVCA3, MDA-MB-231, MCF7). Each column represents a distinct knockdown performed with specific siRNAs. The changes in PSI values are displayed. The map represents the changes in PSI values in a color-coded scale. White areas indicate no shifts. Asterisks indicate transcripts for which AS was altered in HCV-associated HCC.

**A**

| $\Delta$ PSI | THBV/NNoV | THCV/NNoV | THBV&HCV/NNoV | TNoV/NNoV |
|--------------|-----------|-----------|---------------|-----------|
| [10-20[      | 2190      | 844       | 61            | 1638      |
| [20-30[      | 699       | 335       | 77            | 520       |
| [30-40[      | 207       | 117       | 41            | 170       |
| [40-50[      | 75        | 38        | 22            | 51        |
| [50-60[      | 45        | 23        | 8             | 33        |
| [60-70[      | 18        | 10        | 4             | 11        |
| [70-80[      | 14        | 11        | 4             | 10        |
| [80-90[      | 2         | 2         | 3             | 5         |
| [90-100[     | 0         | 1         | 0             | 0         |

**B**

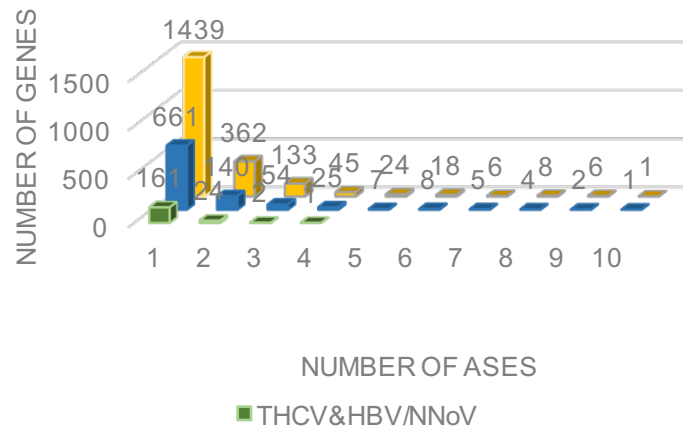

**C**

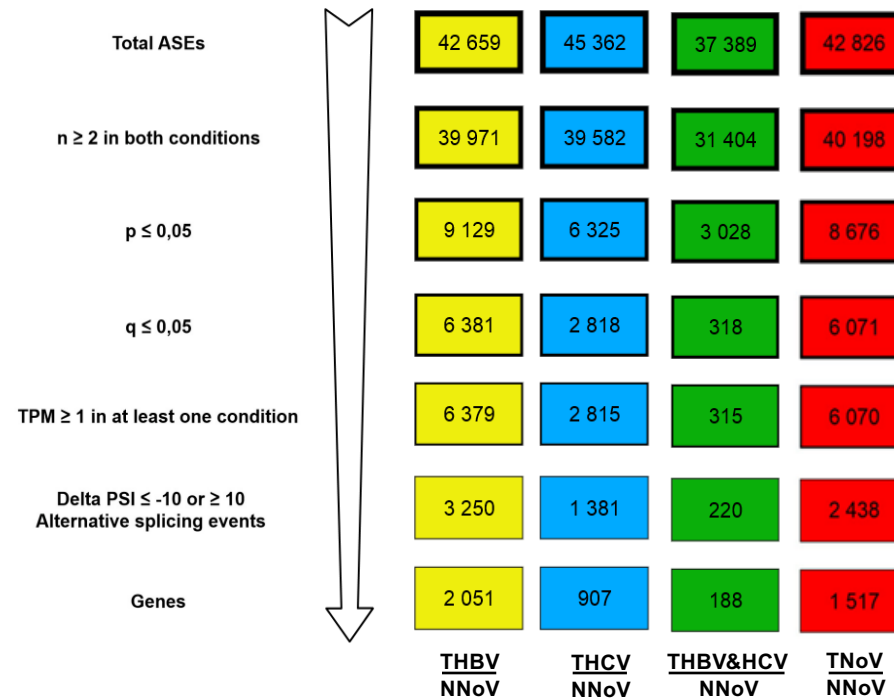

Fig. S1

**A**

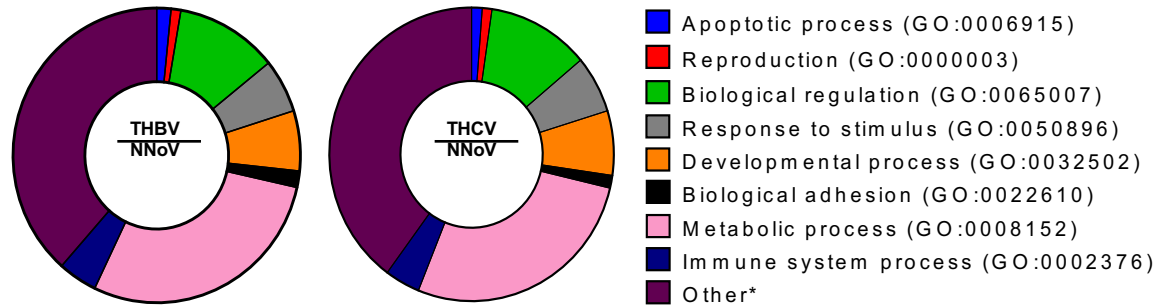

**B**

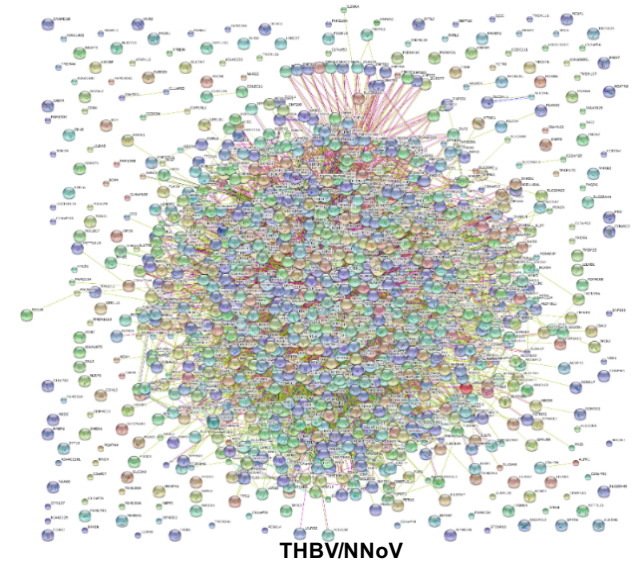

**C**

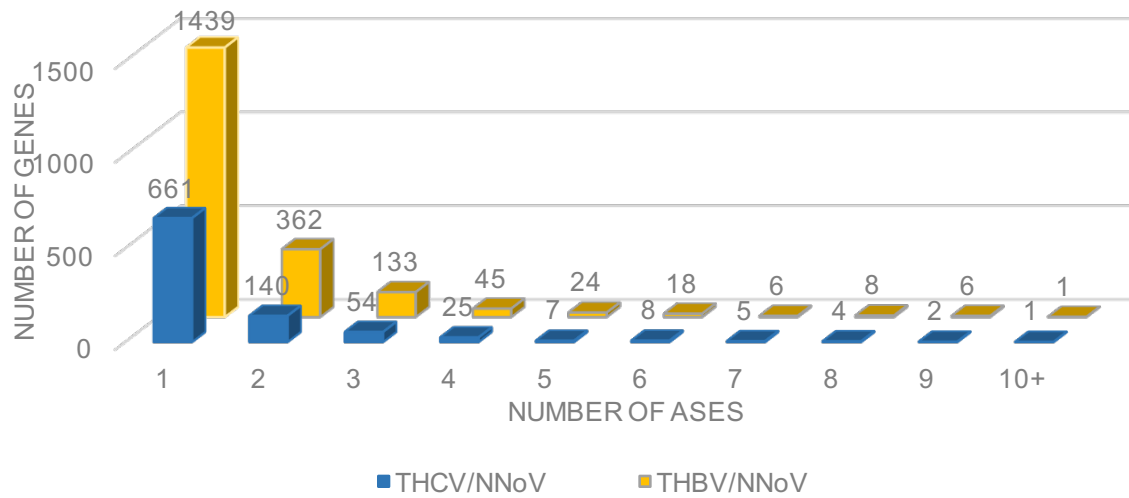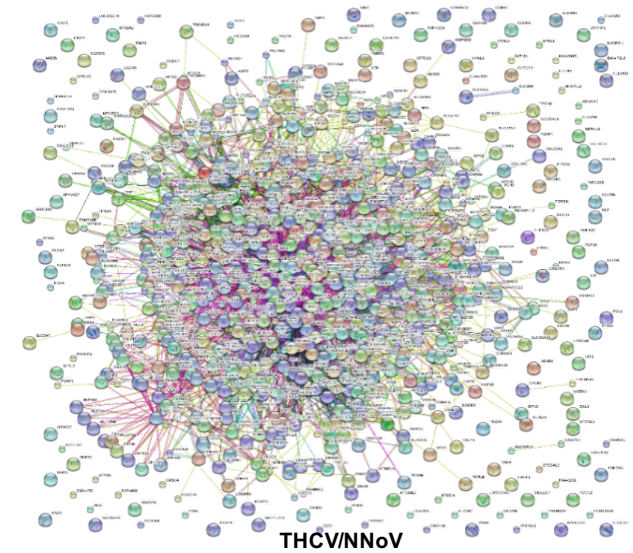

Fig. S2

A

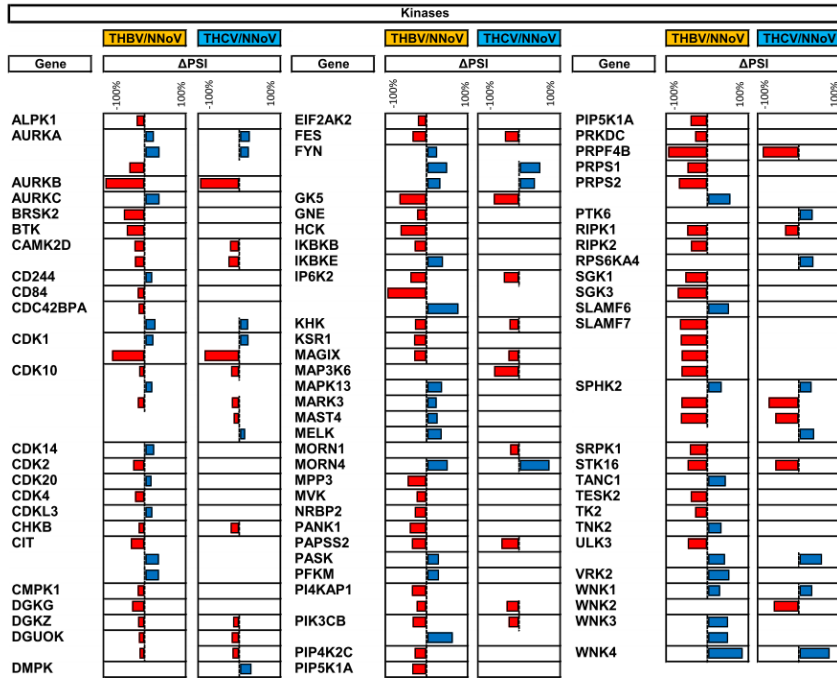

B

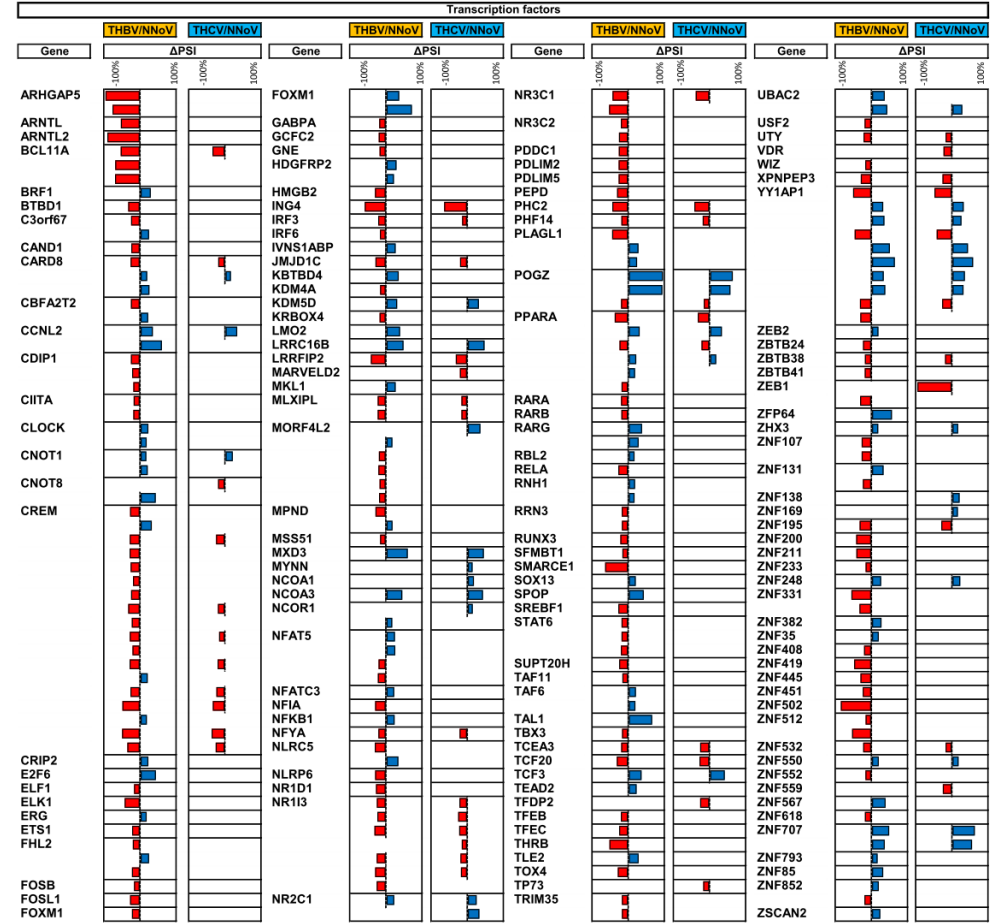

Fig. S3

**A**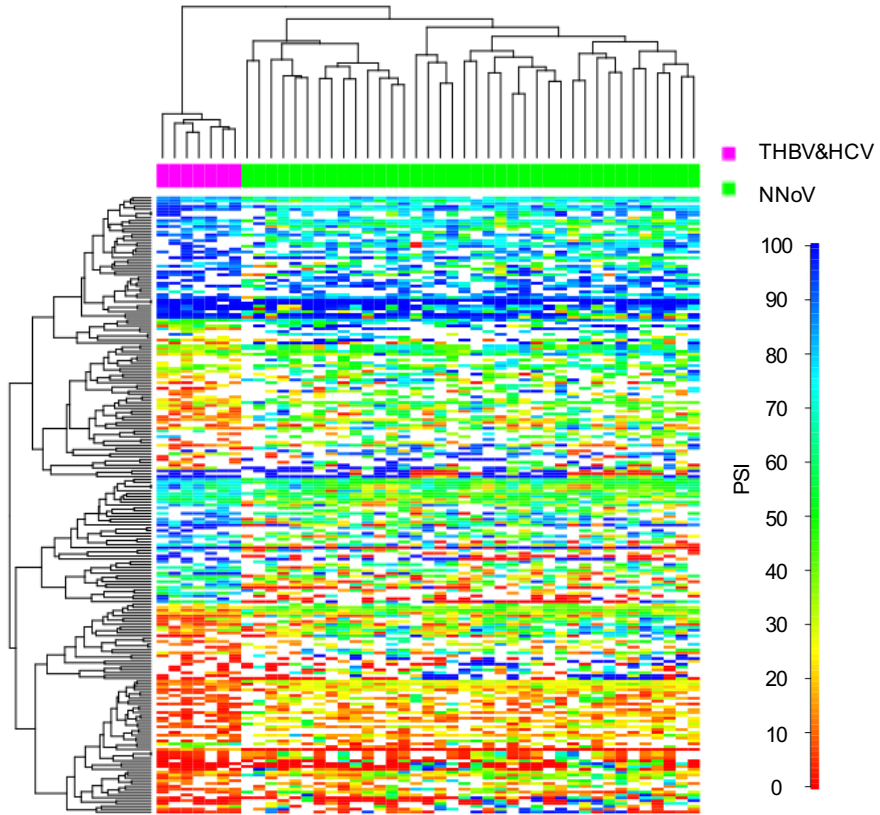**B**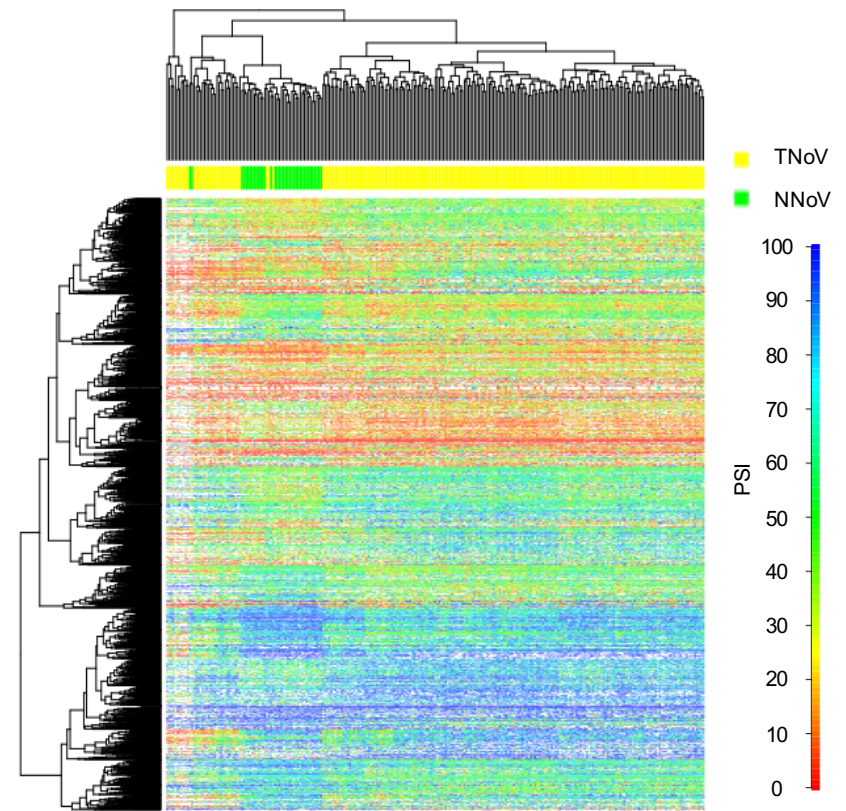**Fig. S4**

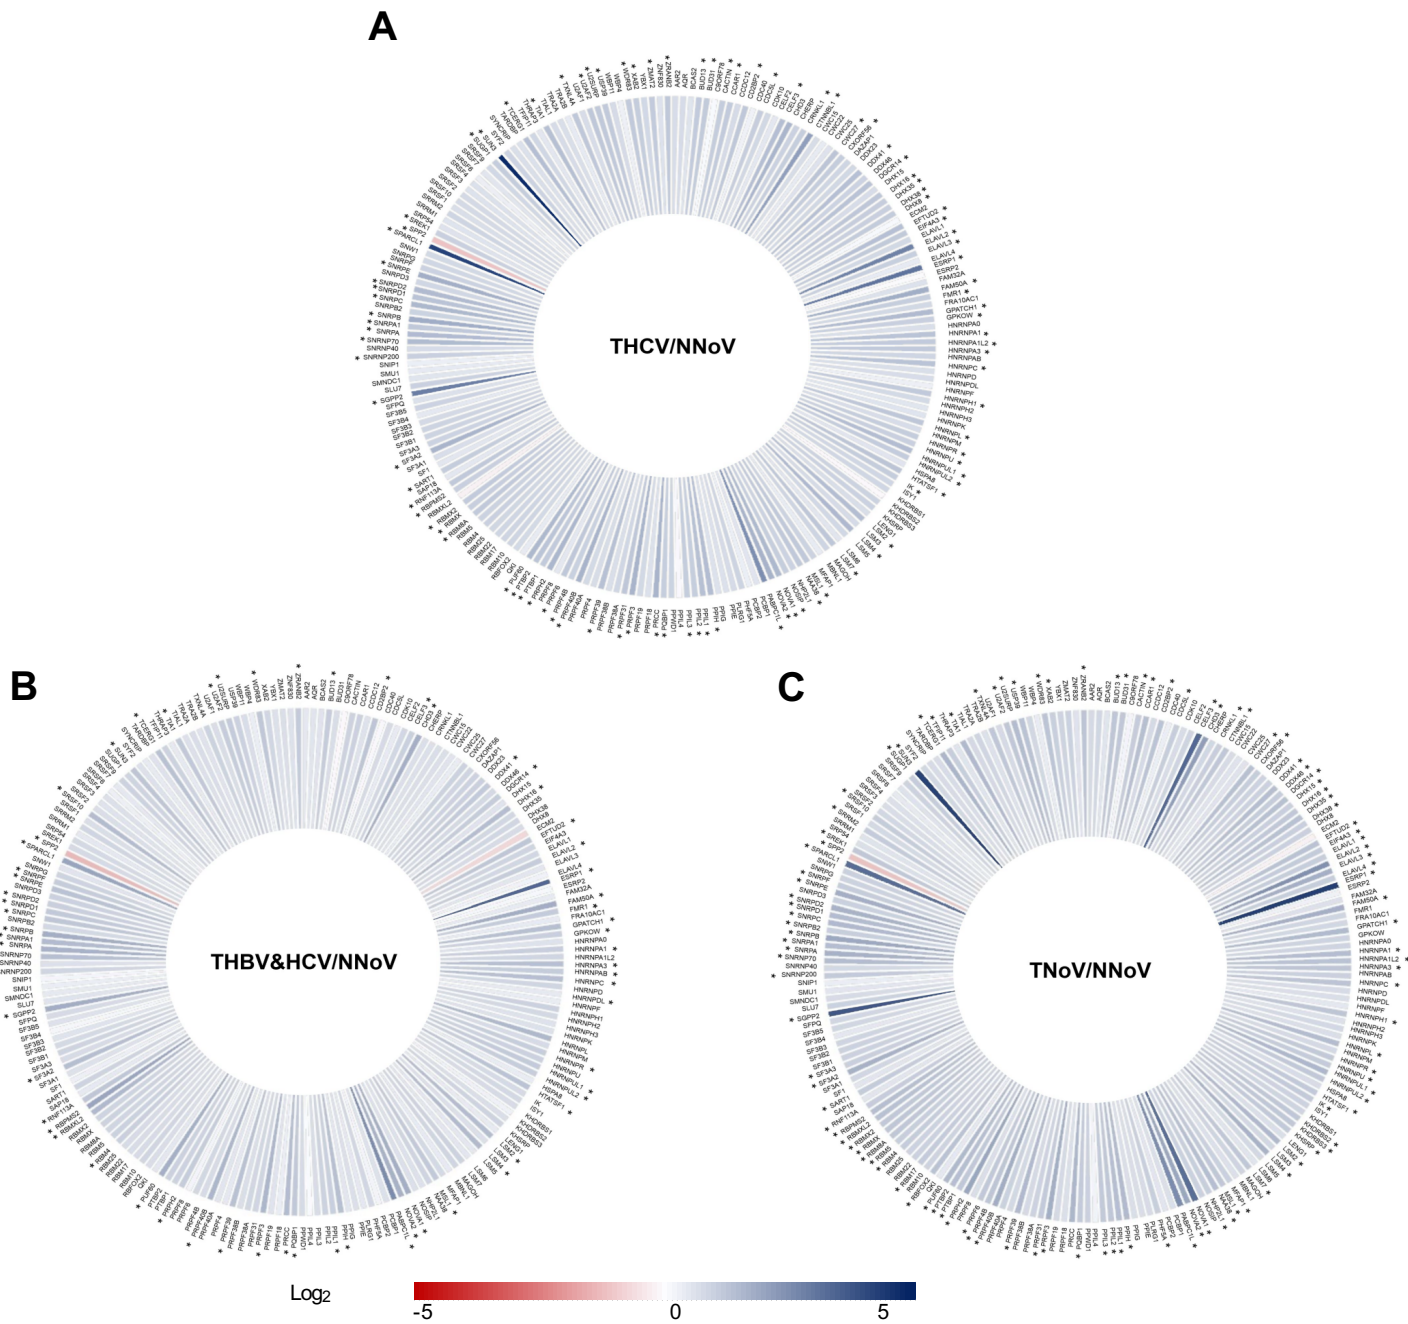

Fig. S5

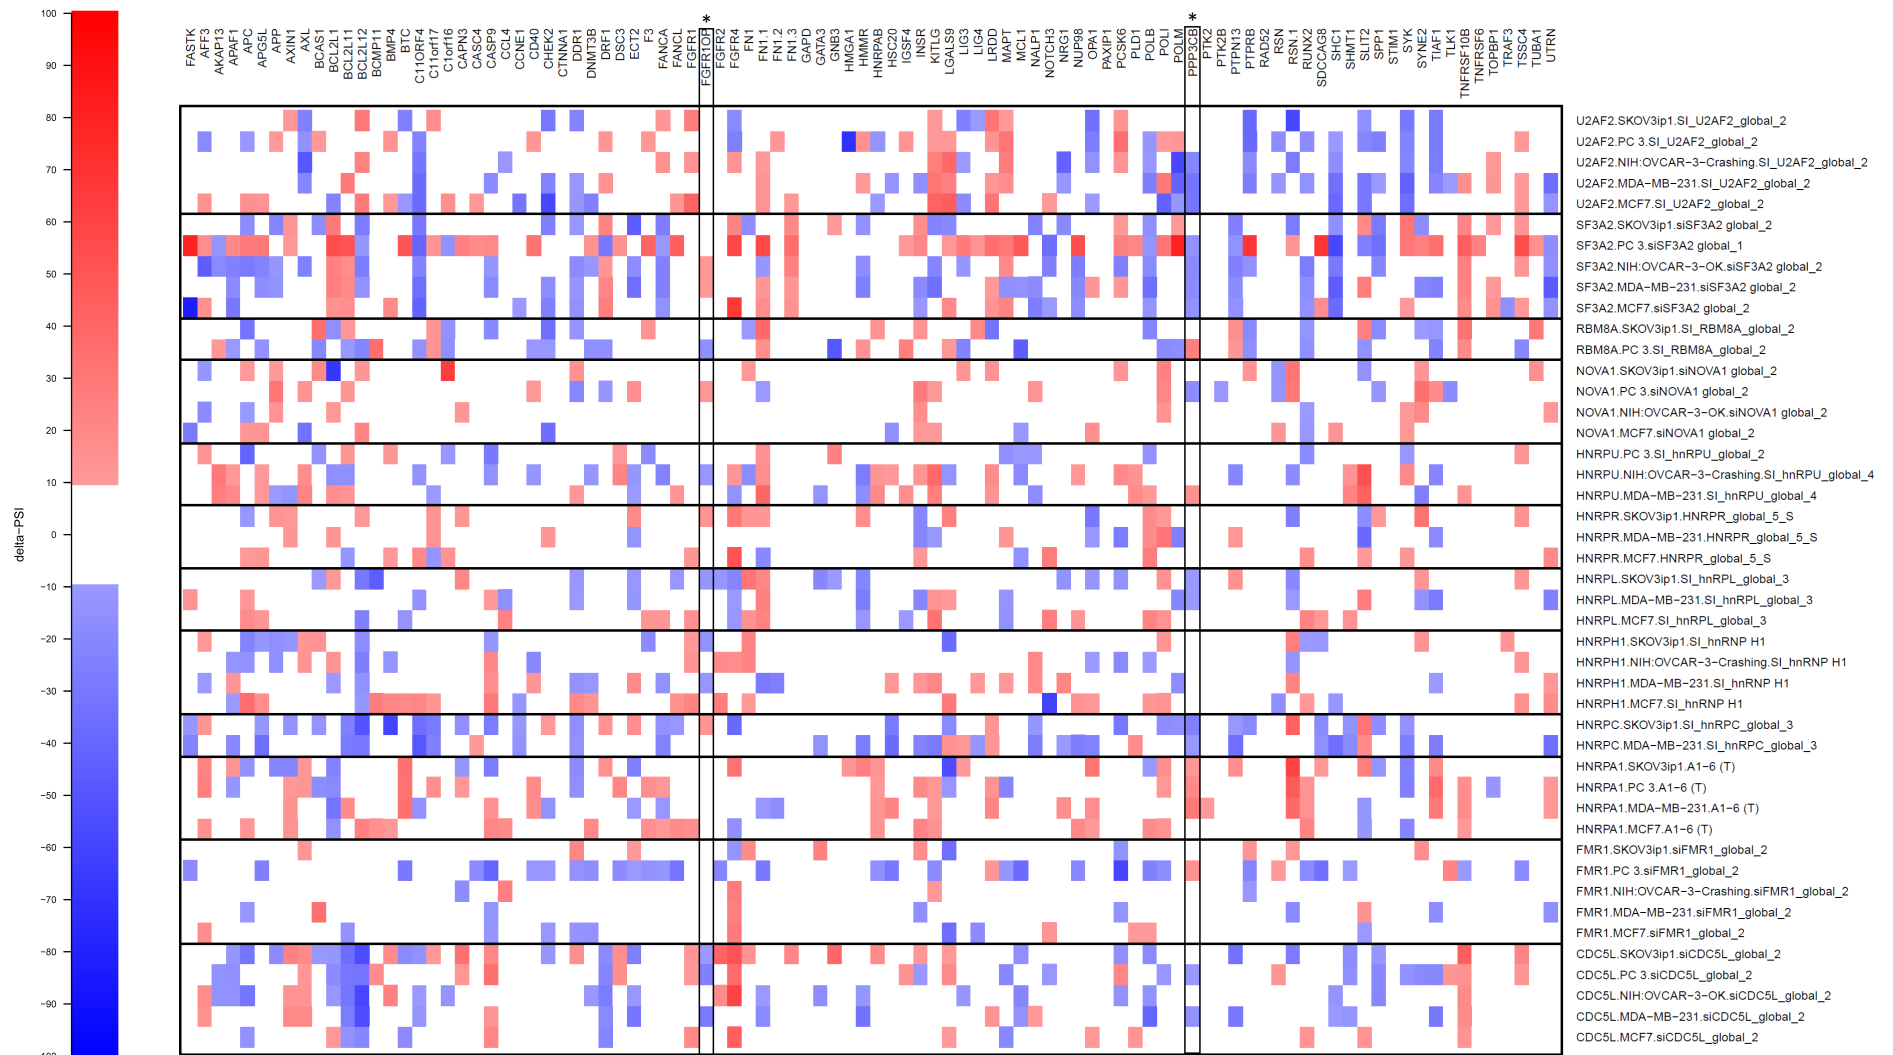

Fig. S6
